# Supplementary material for: The Role of Emotional Competences in Parents’ Vaccine Hesitancy
Source: PubMed Central journal article supplement (PMC8005154; doi:10.3390/vaccines9030298), 2021-03-22
Supplement: vaccines-09-00298-s001.pdf [file vaccines-09-00298-s001.pdf]

## Online supplementary material

**Table S1.** Attitude towards vaccines - Factorial analysis. Items English translation [and original Italian wording], and loadings from factorial analysis in Study 1.

| <b>Factor 1 - Vaccine safety - common fears and concerns about vaccinations</b>                                                                                                                                                                                                          | <b>Loading</b> |
|------------------------------------------------------------------------------------------------------------------------------------------------------------------------------------------------------------------------------------------------------------------------------------------|----------------|
| Healthcare professionals often refuse to recognize the link between vaccines and other illnesses like asthma or allergies. [ <i>Gli operatori sanitari spesso non vogliono riconoscere il legame tra il vaccino e l'insorgere di diverse patologie (es., asma, allergie, altro).</i> ]   | .729           |
| Not all adverse reactions to vaccines are recorded, and are therefore underestimated. [ <i>Non tutte le reazioni avverse ai vaccini vengono registrate e quindi sono spesso sottovalutate.</i> ]                                                                                         | .712           |
| Too many vaccines are administered at once. [ <i>Vengono fatte troppe vaccinazioni in un'unica soluzione.</i> ]                                                                                                                                                                          | .709           |
| Professionals of the National Health System provide information only on the benefits of vaccination and not on the risks. [ <i>Gli operatori del Sistema Sanitario Nazionale danno informazioni solo sui benefici delle vaccinazioni e non sui rischi.</i> ]                             | .707           |
| Serious and very serious side effects of vaccines are often kept hidden. [ <i>Spesso gli effetti collaterali gravi o gravissimi dovuti al vaccino vengono tenuti nascosti.</i> ]                                                                                                         | .697           |
| I am worried about the side effects that could occur immediately after the vaccination. [ <i>Ho paura delle reazioni avverse subito dopo la vaccinazione.</i> ]                                                                                                                          | .671           |
| Vaccinations are administered when children are too young, they should be administered when children are older. [ <i>Le vaccinazioni vengono effettuate su bambini troppo piccoli, bisognerebbe farle quando sono un po' più grandi.</i> ]                                               | .647           |
| I am worried about possible serious side effects that can occur even a long time after vaccination. [ <i>Temo che le reazioni avverse al vaccino possano presentarsi anche molto tempo dopo la vaccinazione.</i> ]                                                                       | .644           |
| I would never forgive myself if my child was seriously damaged by vaccinations. [ <i>Non mi perdonerei mai se mio figlio avesse gravi danni dalle vaccinazioni.</i> ]                                                                                                                    | .611           |
| Pediatric immunizations are above all a profitable economic business for pharmaceutical companies. [ <i>I vaccini per l'infanzia sono soprattutto un business economico delle case farmaceutiche.</i> ]                                                                                  | .604           |
| In order to avoid serious side effects, vaccines should be individually tailored and not extensively administered to all children. [ <i>Per evitare al massimo le reazioni avverse, le vaccinazioni dovrebbero essere decise caso per caso e non fatte in massa a tutti i bambini.</i> ] | .569           |
| Parents who refuse to vaccinate their children are blamed by professionals from the National health system. [ <i>Chi non vaccina viene colpevolizzato dagli operatori del Sistema Sanitario Nazionale.</i> ]                                                                             | .512           |
| Professionals from the National Health System are competent and updated about vaccinations (reverse coded). [ <i>Gli operatori del Sistema Sanitario Nazionale sono preparati ed aggiornati sulle vaccinazioni.</i> ]                                                                    | -.473          |
| Professionals from the National Health System spend enough time to respond to any vaccine-related doubts or concerns (reverse coded). [ <i>In genere gli operatori del Sistema Sanitario Nazionale sono disponibili ad affrontare dubbi o perplessità sulle vaccinazioni.</i> ]          | -.470          |
| Whether or not to vaccinate their children is a private parents' decision and cannot be mandated. [ <i>Vaccinare o meno i propri figli è una scelta privata che spetta esclusivamente ai genitori e non può essere imposta.</i> ]                                                        | .440           |
| I trust more health professionals outside the National health system. [ <i>Ho più fiducia</i>                                                                                                                                                                                            | .439           |

---

*nei consigli di sanitari al di fuori del Sistema Sanitario Nazionale].*

---

**Factor 2 - Diseases prevented - concerns about the diseases prevented by vaccines**

---

|                                                                                                                                                                                                                                                                  |      |
|------------------------------------------------------------------------------------------------------------------------------------------------------------------------------------------------------------------------------------------------------------------|------|
| It is important to vaccinate children because the prevented diseases could have very serious effects. [ <i>È importante vaccinare i bambini perché le malattie che si prevengono possono avere effetti molto gravi.</i> ]                                        | .744 |
| I am worried/concerned that my child could get some diseases if she/he is not vaccinated. [ <i>Ho paura che il bambino contragga le malattie se non viene vaccinato.</i> ]                                                                                       | .739 |
| Children who attend nurseries and kindergartens need to be vaccinated, in order to avoid risks for other children. [ <i>Per frequentare il nido e la scuola materna bisogna che i bambini siano vaccinati in modo da evitare rischi per gli altri bambini.</i> ] | .714 |
| If we stopped vaccinating, diseases that are now very rare could resurge. [ <i>Se si smettesse di vaccinare molte malattie oggi rarissime potrebbero tornare in circolazione.</i> ]                                                                              | .690 |
| I would never forgive myself if my child was seriously damaged by diseases that were preventable by vaccinating. [ <i>Non mi perdonerei mai se mio figlio avesse gravi conseguenze da malattie che potevo prevenire con le vaccinazioni.</i> ]                   | .618 |

---

**Factor 3 - Naturalistic views - Beliefs in natural protection and extreme views against vaccines**

---

|                                                                                                                                                                                                                                                                         |      |
|-------------------------------------------------------------------------------------------------------------------------------------------------------------------------------------------------------------------------------------------------------------------------|------|
| Disease prevented by a vaccine is less risky than vaccine itself. [ <i>La malattia per la quale si vaccina è meno pericolosa del vaccino stesso.</i> ]                                                                                                                  | .583 |
| Breastfeeding protects your child against diseases and infections and it makes immunization unnecessary while he/she is breastfed. [ <i>L'allattamento al seno protegge il bambino da qualsiasi infezione e quindi non è necessario vaccinarlo finché si allatta.</i> ] | .521 |
| Healthy lifestyles can prevent diseases and infections without the need to vaccinate the child. [ <i>Seguendo stili di vita sani si possono evitare le malattie senza necessità di vaccinare il bambino.</i> ]                                                          | .508 |
| Air pollution is the most serious among risk factors that threaten health. [ <i>L'inquinamento atmosferico è il più pericoloso tra i fattori di rischio per la salute.</i> ]                                                                                            | .505 |
| If vaccines are no longer mandatory, it means that they are no longer needed. [ <i>Il fatto che le vaccinazioni non sono più obbligatorie significa che non sono più necessarie.</i> ]                                                                                  | .426 |

---

**Table S2.** Study 1 - Regression analysis on vaccine-refusing behaviour controlling for socio-demographic variables. Relationship between participants' characteristics and vaccine-refusal in univariate analyses.

|                                     |                                                   | OR [95% CI]       | <i>p</i> |
|-------------------------------------|---------------------------------------------------|-------------------|----------|
| Child's age                         |                                                   | 1.00 [.99; 1.00]  | .003     |
| Child's gender                      | female vs. male (reference)                       | .96 [.73; 1.26]   | .759     |
| Number of siblings                  | 1 vs. 0 (reference)                               | 1.05 [.79; 1.41]  | .725     |
|                                     | 2 or more vs. 0 (reference)                       | 1.11 [.71; 1.73]  | .651     |
| Mother's age                        |                                                   | .98 [.96; 1.01]   | .134     |
| Father's age                        |                                                   | .99 [.97; 1.01]   | .310     |
| Mother's education                  | high school vs. ≤ middle school (reference)       | 2.87 [1.38; 5.99] | .005     |
|                                     | university vs. ≤ middle school (reference)        | 3.16 [1.53; 6.55] | .002     |
| Father's education                  | high school vs. ≤ middle school (reference)       | 1.25 [.84; 1.86]  | .280     |
|                                     | university vs. ≤ middle school (reference)        | 1.51 [1.00; 2.28] | .048     |
| Mother's employment                 | not employed vs. employed (reference)             | .60 [.41; .86]    | .006     |
| Father's employment                 | not employed vs. employed (reference)             | .50 [.16; 1.60]   | .243     |
| Mother's citizenship                | Other vs. Italian (reference)                     | 3.64 [1.34; 9.92] | .011     |
| Father's citizenship                | Other vs. Italian (reference)                     | 1.97 [.91; 4.25]  | .085     |
| Type of family                      | single parent vs. couple (reference)              | .72 [.35; 1.50]   | .381     |
| Ease to get to the end of the month | Very easily vs. Very difficult (reference)        | 1.63 [.87; 3.06]  | .130     |
|                                     | Somewhat easily vs. Very difficult (reference)    | 1.31 [.74; 2.34]  | .357     |
|                                     | Somewhat difficult vs. Very difficult (reference) | 1.07 [.59; 1.95]  | .816     |
| Who completed the questionnaire     | Father vs. Mother (reference)                     | 1.84 [1.27; 2.69] | .001     |

**Table S3.** Study 1 - Regression analysis on vaccine-refusing behaviour controlling for socio-demographic variables. Full model predicting vaccine-refusal based on attitudes and socio-demographic variables.

|                                                              | OR   | [95% CI]      | <i>p</i> |
|--------------------------------------------------------------|------|---------------|----------|
| Vaccine safety                                               | 5.53 | [4.05, 7.55]  | < .001   |
| Diseases prevented                                           | .20  | [.15, .26]    | < .001   |
| Naturalistic views                                           | .72  | [.51, 1.02]   | .062     |
| Child's age (≤ vs. > 6 years)                                | 1.68 | [.97, 2.92]   | .065     |
| Mother's education level (≥ high school vs. ≤ middle school) | 3.64 | [1.26, 10.48] | .017     |
| Father's education level (≥ high school vs. ≤ middle school) | 1.21 | [.70, 2.09]   | .502     |
| Mother's citizenship (Italian vs. other)                     | 6.25 | [1.70, 22.96] | .006     |
| Mother's employment status (employed vs. not)                | 2.10 | [1.19, 3.70]  | .010     |
| Who completed the questionnaire (father vs. mother)          | 2.15 | [1.13, 4.08]  | .019     |
